# Supplementary material
Source: Springer Nature journal article supplement (https://www.springermedizin.de/resource/supplementary/12913_2013_3042_MOESM1_ESM.pdf/9532256)

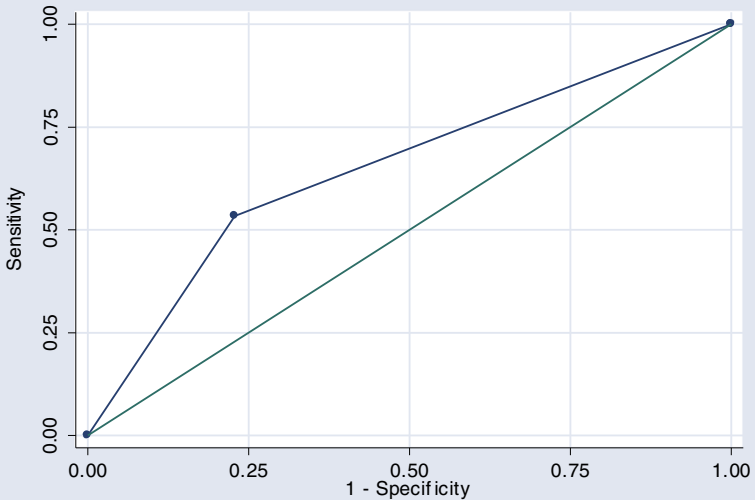

Area under ROC curve = 0.6528

Supplement: MOESM1 [file 9532256]
